# Supplementary material
Source: PubMed Central journal article supplement (PMC2783553)
Supplement: NIHMS148981-supplement-supplement_1.pdf [file NIHMS148981-supplement-supplement_1.pdf]

### **Figure Legend to Supplementary Figure 1 (A,B)**

Correlation of  $\log_{10}\Delta\text{cpm}$  responses to 48 H1 and H5 homologous peptides in a cohort of 24 subjects. Gray boxes indicate statistical threshold (2SD) for responders. For each graph, X-axis indicates responses to H5, Y-axis to H1 peptides. Statistics calculated according to SigmaPlot 2000.

# Supplementary 1A

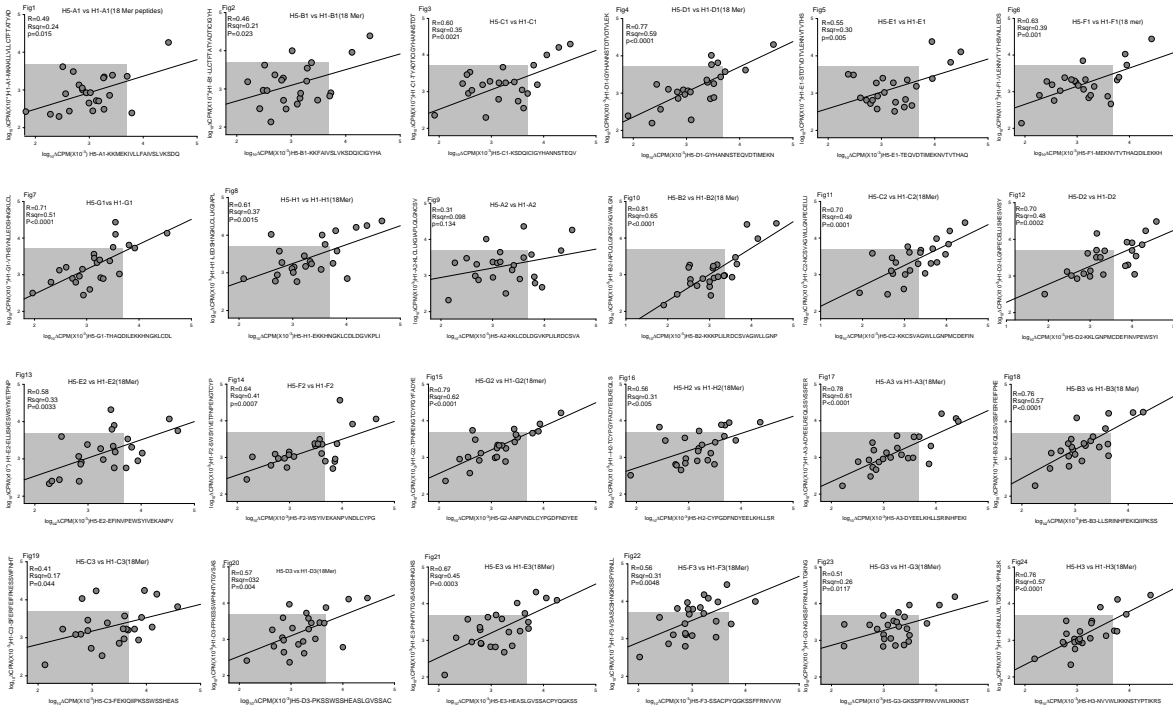

# Supplementary 1B

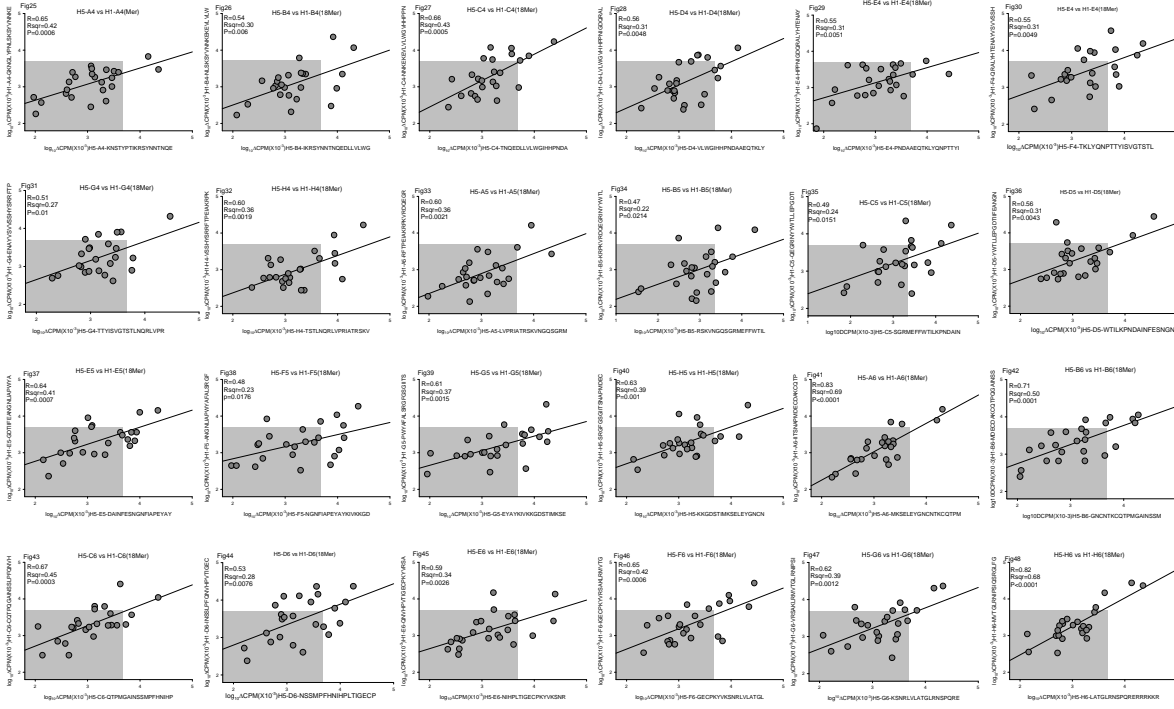

## Supplementary Table 1

| <b><u>Mutant Peptide</u></b> | <b><u>Accession No*</u></b> | <b><u>Peptide sequence</u></b> |
|------------------------------|-----------------------------|--------------------------------|
| A7                           | AAT39066 (1)                | KSDQICIGYHANNWTEQV             |
| B7                           | AAT39066 (2)                | GYHANNWTEQVDTIMEKN             |
| C7                           | AAS65615 (1)                | MEKNVTVTTHAQDILEKTH            |
| D7                           | AAT73275 (1)                | THAQDILEKTHNGKLCDL             |
| E7                           | AAF74331 (1)                | EKTHNGKLCDLNGVKPLI             |
| F7                           | AAT39065 (1)                | EFINVPEWSYIVEKANPA             |
| G7                           | AAT39065 (2)                | WSYIVEKANPANDLCYPG             |
| H7                           | AAT39065 (3)                | ANPANDLCYPGDFNDYEE             |
| A8                           | AAT39065 (4)                | LLSRINHFEEKIQIIPKNS            |
| B8                           | AAT39065 (5)                | FEKIQIIPKNSWSSHEAS             |
| C8                           | AAT39065 (6)                | PKNSWSSHEASLGVSSAC             |
| D8                           | BAE46949 (1)                | PKSSWLSHEASLGVSSAC             |
| E8                           | AAT73275 (1)                | HEASLGVSSVCPYQGKSS             |
| F8                           | AAS65615 (2)                | HEASLGVSSACPYQRKSS             |
| G8                           | AAT73275 (2)                | SSVCPYQGKSSFFRNVVW             |
| H8                           | AAS65615 (3)                | SSACPYQRKSSFFRNVVW             |
| A9                           | AAS65615 (4)                | RKSSFFRNVVWLIIKKNST            |
| B9                           | AAT39065 (7)                | GKSSFFRNVVWLIIKKNNA            |
| C9                           | AAT39065 (8)                | NVVWLIIKKNAYPTIKRS             |
| D9                           | AAT39065 (9)                | KNNAYPTIKRSYNNNTNQE            |
| E9                           | AAT39065 (10)               | VLWGIHHPNDAAEQTRLY             |
| F9                           | AAT39065 (11)               | PNDAAEQTKLYQNPTTYV             |
| G9                           | AAT73275 (3)                | TKLYQNPTTYVSVGTSTL             |
| H9                           | AAT73725 (4)                | TTYVSVGTSTLNQRLVPR             |
| A10                          | AAT39065 (12)               | TSTLNQRLVPKIATRISKV            |
| B10                          | AAT39065 (13)               | LVPKIATRISKVNGQNGRM            |
| C10                          | AAT39065 (14)               | RSKVNGQNGRMEFFWTIL             |
| D10                          | AAT39065 (15)               | NGRMEFFWTILKPNDAIN             |
| E10                          | AAT39065 (16)               | EYAYKIVKKGDSAIMKSE             |
| F10                          | AAT39065 (17)               | KKGDSAIMKSELEYGNCN             |
| B11                          | AAS65618 (2)                | PKSSWSSHEVSLGVSSAC             |
| D11                          | AAT84153 (4)                | VLWGIQHPNDAAEQTKLY             |
| G11                          | AAT84153 (10)               | SGRMEFFRTILKPNDAIN             |

\*NCBI accession number; in parentheses are shown the number of isolates with the particular peptide sequence.
